# Supplementary material
Source: publisher site journal article supplement (https://www.dovepress.com/get_supplementary_file.php?f=238051-Table-S2.xlsx)
Supplement: Supplementary file 1 [file get_supplementary_file.php]

## Sheet: Sheet1
Supplementary Tables S2:Functional enrichment analysis of the DEmRNAs.
Category	Term	Count	%	PValue	Genes	List Total	Pop Hits	Pop Total	Fold Enrichment	Bonferroni	Benjamini	FDR
GOTERM_BP_DIRECT	GO:0045893~positive regulation of transcription, DNA-templated	14	0.0994177	5.57884e-07	SOX11, PPARG, OTX2, ESR1, FOXO1, IGF1, SIX4, PROX1, FOXN3, INHBA, MYOCD, SFRP1, GATA3, KLF4	78	515	16792	5.85233	0.000583377	0.000583377	0.000886489
GOTERM_BP_DIRECT	GO:0045944~positive regulation of transcription from RNA polymerase II promoter	18	0.127823	1.6501e-06	SOX11, PPARG, OTX2, ESR1, IGF1, FOXO1, ZEB2, SIX4, NR4A3, PROX1, INHBA, MEOX2, MYOCD, CSRNP3, GATA3, EBF1, HIF3A, KLF4	78	981	16792	3.95013	0.00172452	0.000862633	0.00262203
GOTERM_BP_DIRECT	GO:0042493~response to drug	10	0.0710126	1.01768e-05	TXNIP, INHBA, SFRP1, GATA3, SLC6A4, TGFBR2, SLC12A5, PPARG, LRP8, HTR2A	78	304	16792	7.08165	0.0105885	0.00354204	0.01617
GOTERM_BP_DIRECT	GO:0000122~negative regulation of transcription from RNA polymerase II promoter	14	0.0994177	2.16201e-05	TXNIP, SOX11, PPARG, ESR1, FOXO1, ZEB2, NR4A3, CBX8, PROX1, MYOCD, GATA3, LRP8, KLF4, VLDLR	78	720	16792	4.18604	0.0223611	0.00563777	0.0343494
GOTERM_BP_DIRECT	GO:0008284~positive regulation of cell proliferation	11	0.0781139	5.11026e-05	HOXA3, SFRP1, MYOCD, SOX11, TGFBR2, IGF1, PDGFD, KIT, CBX8, PROX1, HTR2A	78	466	16792	5.08177	0.0520511	0.010634	0.0811725
GOTERM_BP_DIRECT	GO:0008584~male gonad development	6	0.0426076	7.09743e-05	INHBA, SFRP1, GATA3, ESR1, KIT, SIX4	78	94	16792	13.7414	0.0715528	0.0122974	0.11272
GOTERM_BP_DIRECT	GO:0006366~transcription from RNA polymerase II promoter	11	0.0781139	0.000113437	CSRNP3, MEOX2, MYOCD, SOX11, GATA3, EBF1, OTX2, HIF3A, ESR1, SIX4, KLF4	78	513	16792	4.61618	0.111892	0.0168089	0.180103
GOTERM_BP_DIRECT	GO:0008285~negative regulation of cell proliferation	9	0.0639114	0.000453328	DLC1, SPRY2, INHBA, SFRP1, MYOCD, GATA3, PTPN14, PROX1, KLF4	78	396	16792	4.89277	0.377672	0.0575628	0.717923
GOTERM_BP_DIRECT	GO:0048565~digestive tract development	4	0.0284051	0.000545951	MYOCD, GATA3, TGFBR2, KIT	78	35	16792	24.6037	0.435165	0.0614968	0.864013
GOTERM_BP_DIRECT	GO:0042472~inner ear morphogenesis	4	0.0284051	0.00174327	SPRY2, GATA3, SOBP, SIX4	78	52	16792	16.5602	0.83879	0.166819	2.73443
GOTERM_BP_DIRECT	GO:0060065~uterus development	3	0.0213038	0.00182243	MYOCD, GATA3, ESR1	78	14	16792	46.1319	0.851624	0.159245	2.85693
GOTERM_BP_DIRECT	GO:0045892~negative regulation of transcription, DNA-templated	9	0.0639114	0.00200622	SFRP1, GATA3, PPARG, FOXO1, DEPDC1, SIX4, PROX1, KLF4, FOXN3	78	499	16792	3.88284	0.877618	0.160586	3.14075
GOTERM_BP_DIRECT	GO:2000679~positive regulation of transcription regulatory region DNA binding	3	0.0213038	0.00209657	GATA3, IGF1, KLF4	78	15	16792	43.0564	0.888677	0.155382	3.28001
GOTERM_BP_DIRECT	GO:0048485~sympathetic nervous system development	3	0.0213038	0.00209657	PLXNA4, SOX11, GATA3	78	15	16792	43.0564	0.888677	0.155382	3.28001
GOTERM_BP_DIRECT	GO:0070301~cellular response to hydrogen peroxide	4	0.0284051	0.0022705	FOXO1, PDGFD, CBX8, KLF4	78	57	16792	15.1075	0.907231	0.156193	3.54753
GOTERM_BP_DIRECT	GO:0043401~steroid hormone mediated signaling pathway	4	0.0284051	0.0022705	PPARG, NR3C2, ESR1, NR4A3	78	57	16792	15.1075	0.907231	0.156193	3.54753
GOTERM_BP_DIRECT	GO:0035162~embryonic hemopoiesis	3	0.0213038	0.00238898	GATA3, TGFBR2, KIT	78	16	16792	40.3654	0.918068	0.153623	3.72937
GOTERM_BP_DIRECT	GO:0048661~positive regulation of smooth muscle cell proliferation	4	0.0284051	0.00262939	TGFBR2, IGF1, PDGFD, NR4A3	78	60	16792	14.3521	0.936325	0.158124	4.09737
GOTERM_BP_DIRECT	GO:0043627~response to estrogen	4	0.0284051	0.00330175	GATA3, TGFBR2, PPARG, ESR1	78	65	16792	13.2481	0.96855	0.184122	5.11955
GOTERM_BP_DIRECT	GO:0051966~regulation of synaptic transmission, glutamatergic	3	0.0213038	0.00493328	SYT1, ATP1A2, UNC13A	78	23	16792	28.0803	0.994332	0.249779	7.55767
GOTERM_BP_DIRECT	GO:0006351~transcription, DNA-templated	18	0.127823	0.00655725	TXNIP, EGR3, PPARG, NR3C2, PTPN14, ESR1, FOXO1, ZNF367, ZEB2, DEPDC1, NR4A3, CBX8, PROX1, FOXN3, MYT1L, HOXA3, EBF1, HIF3A	78	1955	16792	1.98214	0.998973	0.303845	9.92609
GOTERM_BP_DIRECT	GO:0014065~phosphatidylinositol 3-kinase signaling	3	0.0213038	0.00676364	GATA3, IGF1, HTR2A	78	27	16792	23.9202	0.999174	0.298784	10.223
GOTERM_BP_DIRECT	GO:0010628~positive regulation of gene expression	6	0.0426076	0.00705918	SPRY2, INHBA, SOX11, SLC6A4, KIT, KLF4	78	262	16792	4.93012	0.999395	0.297325	10.6465
GOTERM_BP_DIRECT	GO:0001822~kidney development	4	0.0284051	0.00722275	SOX11, GATA3, ROBO2, PROX1	78	86	16792	10.0131	0.999491	0.291535	10.8801
GOTERM_BP_DIRECT	GO:0060412~ventricular septum morphogenesis	3	0.0213038	0.00777733	SOX11, TGFBR2, PROX1	78	29	16792	22.2706	0.999716	0.298884	11.6679
GOTERM_BP_DIRECT	GO:0097324~melanocyte migration	2	0.0142025	0.00915028	ZEB2, KIT	78	2	16792	215.282	0.999933	0.330106	13.5903
GOTERM_BP_DIRECT	GO:0002088~lens development in camera-type eye	3	0.0213038	0.00999555	GATA3, TGFBR2, PROX1	78	33	16792	19.5711	0.999973	0.343162	14.7542
GOTERM_BP_DIRECT	GO:0045787~positive regulation of cell cycle	3	0.0213038	0.010589	SLC6A4, NR4A3, PROX1	78	34	16792	18.9955	0.999985	0.348367	15.5625
GOTERM_BP_DIRECT	GO:0007420~brain development	5	0.0355063	0.0113132	SYT1, TGFBR2, ROBO2, PROX1, SLC7A11	78	190	16792	5.66532	0.999993	0.356466	16.5393
GOTERM_BP_DIRECT	GO:0051091~positive regulation of sequence-specific DNA binding transcription factor activity	4	0.0284051	0.0124367	MYOCD, PPARG, ESR1, KIT	78	105	16792	8.20122	0.999998	0.373441	18.0336
GOTERM_BP_DIRECT	GO:0001657~ureteric bud development	3	0.0213038	0.0131136	SDC1, SFRP1, ROBO2	78	38	16792	16.996	0.999999	0.378814	18.9219
GOTERM_BP_DIRECT	GO:0001568~blood vessel development	3	0.0213038	0.0131136	TGFBR2, FOXO1, COL5A1	78	38	16792	16.996	0.999999	0.378814	18.9219
GOTERM_BP_DIRECT	GO:0060374~mast cell differentiation	2	0.0142025	0.0136944	GATA3, KIT	78	3	16792	143.521	0.999999	0.381697	19.6767
GOTERM_BP_DIRECT	GO:0034765~regulation of ion transmembrane transport	4	0.0284051	0.014432	KCNJ6, SCN3A, KCNB1, KCNA4	78	111	16792	7.75791	1	0.387686	20.6259
GOTERM_BP_DIRECT	GO:0030218~erythrocyte differentiation	3	0.0213038	0.0144645	INHBA, GATA3, KIT	78	40	16792	16.1462	1	0.378899	20.6676
GOTERM_BP_DIRECT	GO:0007165~signal transduction	12	0.0852152	0.0164263	DLC1, GATA3, PPARG, NR3C2, ESR1, IGF1, LRP8, DEPDC1, KIT, RACGAP1, VLDLR, FAM126A	78	1161	16792	2.22514	1	0.408438	23.1401
GOTERM_BP_DIRECT	GO:0048538~thymus development	3	0.0213038	0.0165982	HOXA3, GATA3, SIX4	78	43	16792	15.0197	1	0.402455	23.3533
GOTERM_BP_DIRECT	GO:0071363~cellular response to growth factor stimulus	3	0.0213038	0.0180907	SFRP1, LRP8, KLF4	78	45	16792	14.3521	1	0.420508	25.181
GOTERM_BP_DIRECT	GO:0072107~positive regulation of ureteric bud formation	2	0.0142025	0.0182179	GATA3, SIX4	78	4	16792	107.641	1	0.413869	25.3349
GOTERM_BP_DIRECT	GO:0030910~olfactory placode formation	2	0.0142025	0.0182179	SIX4, PROX1	78	4	16792	107.641	1	0.413869	25.3349
GOTERM_BP_DIRECT	GO:0021615~glossopharyngeal nerve morphogenesis	2	0.0142025	0.0182179	HOXA3, PLXNA4	78	4	16792	107.641	1	0.413869	25.3349
GOTERM_BP_DIRECT	GO:0038026~reelin-mediated signaling pathway	2	0.0142025	0.0182179	LRP8, VLDLR	78	4	16792	107.641	1	0.413869	25.3349
GOTERM_BP_DIRECT	GO:0045165~cell fate commitment	3	0.0213038	0.0188575	SPRY2, GATA3, PPARG	78	46	16792	14.0401	1	0.4162	26.104
GOTERM_BP_DIRECT	GO:0045600~positive regulation of fat cell differentiation	3	0.0213038	0.0196378	SFRP1, PPARG, HTR2A	78	47	16792	13.7414	1	0.4207	27.0324
GOTERM_BP_DIRECT	GO:0031100~organ regeneration	3	0.0213038	0.0196378	TGFBR2, PPARG, NR4A3	78	47	16792	13.7414	1	0.4207	27.0324
GOTERM_BP_DIRECT	GO:0045578~negative regulation of B cell differentiation	2	0.0142025	0.022721	INHBA, SFRP1	78	5	16792	86.1128	1	0.460125	30.5947
GOTERM_BP_DIRECT	GO:0042542~response to hydrogen peroxide	3	0.0213038	0.0228917	TXNIP, SDC1, NR4A3	78	51	16792	12.6637	1	0.454239	30.7871
GOTERM_BP_DIRECT	GO:0007519~skeletal muscle tissue development	3	0.0213038	0.0228917	MEOX2, CFL2, SIX4	78	51	16792	12.6637	1	0.454239	30.7871
GOTERM_BP_DIRECT	GO:0007268~chemical synaptic transmission	5	0.0355063	0.0244576	SYT1, SLC6A4, SLC12A5, UNC13A, HTR2A	78	240	16792	4.48504	1	0.468325	32.5288
GOTERM_BP_DIRECT	GO:0010629~negative regulation of gene expression	4	0.0284051	0.0250742	SFRP1, SOX11, ESR1, KLF4	78	137	16792	6.28561	1	0.468701	33.2033
GOTERM_BP_DIRECT	GO:0048146~positive regulation of fibroblast proliferation	3	0.0213038	0.0254675	ESR1, IGF1, PDGFD	78	54	16792	11.9601	1	0.466095	33.6302
GOTERM_BP_DIRECT	GO:0071168~protein localization to chromatin	2	0.0142025	0.0272036	ESR1, ESCO2	78	6	16792	71.7607	1	0.480902	35.4843
GOTERM_BP_DIRECT	GO:0060527~prostate epithelial cord arborization involved in prostate glandular acinus morphogenesis	2	0.0142025	0.0272036	SFRP1, ESR1	78	6	16792	71.7607	1	0.480902	35.4843
GOTERM_BP_DIRECT	GO:0046321~positive regulation of fatty acid oxidation	2	0.0142025	0.0272036	PPARG, NR4A3	78	6	16792	71.7607	1	0.480902	35.4843
GOTERM_BP_DIRECT	GO:2000052~positive regulation of non-canonical Wnt signaling pathway	2	0.0142025	0.0272036	SFRP1, RSPO3	78	6	16792	71.7607	1	0.480902	35.4843
GOTERM_BP_DIRECT	GO:0043406~positive regulation of MAP kinase activity	3	0.0213038	0.0300081	PDGFD, KIT, HTR2A	78	59	16792	10.9465	1	0.507471	38.3771
GOTERM_BP_DIRECT	GO:0009612~response to mechanical stimulus	3	0.0213038	0.0300081	TXNIP, TGFBR2, PPARG	78	59	16792	10.9465	1	0.507471	38.3771
GOTERM_BP_DIRECT	GO:0050679~positive regulation of epithelial cell proliferation	3	0.0213038	0.0309522	SFRP1, IGF1, NR4A3	78	60	16792	10.7641	1	0.510783	39.3233
GOTERM_BP_DIRECT	GO:0060017~parathyroid gland development	2	0.0142025	0.031666	HOXA3, GATA3	78	7	16792	61.5092	1	0.511363	40.0297
GOTERM_BP_DIRECT	GO:0060687~regulation of branching involved in prostate gland morphogenesis	2	0.0142025	0.031666	SFRP1, ESR1	78	7	16792	61.5092	1	0.511363	40.0297
GOTERM_BP_DIRECT	GO:0071455~cellular response to hyperoxia	2	0.0142025	0.031666	PPARG, FOXO1	78	7	16792	61.5092	1	0.511363	40.0297
GOTERM_BP_DIRECT	GO:0006367~transcription initiation from RNA polymerase II promoter	4	0.0284051	0.0327002	PPARG, NR3C2, ESR1, NR4A3	78	152	16792	5.66532	1	0.515435	41.0394
GOTERM_BP_DIRECT	GO:0007613~memory	3	0.0213038	0.0328753	SLC6A4, HTR2A, VLDLR	78	62	16792	10.4169	1	0.510114	41.2088
GOTERM_BP_DIRECT	GO:0014068~positive regulation of phosphatidylinositol 3-kinase signaling	3	0.0213038	0.0358456	IGF1, PDGFD, KIT	78	65	16792	9.93609	1	0.534043	44.0133
GOTERM_BP_DIRECT	GO:0035019~somatic stem cell population maintenance	3	0.0213038	0.0358456	SFRP1, KIT, KLF4	78	65	16792	9.93609	1	0.534043	44.0133
GOTERM_BP_DIRECT	GO:0007411~axon guidance	4	0.0284051	0.0366283	GATA3, OTX2, ROBO2, NR4A3	78	159	16792	5.4159	1	0.534826	44.7311
GOTERM_BP_DIRECT	GO:0002244~hematopoietic progenitor cell differentiation	3	0.0213038	0.0368581	INHBA, SFRP1, ESCO2	78	66	16792	9.78555	1	0.530188	44.9402
GOTERM_BP_DIRECT	GO:0001938~positive regulation of endothelial cell proliferation	3	0.0213038	0.0399607	EGR3, F3, PROX1	78	69	16792	9.36009	1	0.552845	47.6921
GOTERM_BP_DIRECT	GO:0010863~positive regulation of phospholipase C activity	2	0.0142025	0.0405302	ESR1, KIT	78	9	16792	47.8405	1	0.551317	48.1829
GOTERM_BP_DIRECT	GO:0071300~cellular response to retinoic acid	3	0.0213038	0.0410163	SLC6A4, PPARG, KLF4	78	70	16792	9.22637	1	0.549098	48.5985
GOTERM_BP_DIRECT	GO:0007399~nervous system development	5	0.0355063	0.0428436	INHBA, MYT1L, ZIC5, ZEB2, VLDLR	78	287	16792	3.75056	1	0.558645	50.133
GOTERM_BP_DIRECT	GO:0045444~fat cell differentiation	3	0.0213038	0.0442456	FOXO1, NR4A3, KLF4	78	73	16792	8.84721	1	0.56415	51.2811
GOTERM_BP_DIRECT	GO:0007584~response to nutrient	3	0.0213038	0.0453425	SLC6A4, TGFBR2, PPARG	78	74	16792	8.72765	1	0.566926	52.162
GOTERM_BP_DIRECT	GO:0007623~circadian rhythm	3	0.0213038	0.0464494	EGR3, SLC6A4, PROX1	78	75	16792	8.61128	1	0.569682	53.0358
GOTERM_BP_DIRECT	GO:0060021~palate development	3	0.0213038	0.0475662	INHBA, MEOX2, TGFBR2	78	76	16792	8.49798	1	0.572418	53.9023
GOTERM_BP_DIRECT	GO:0051260~protein homooligomerization	4	0.0284051	0.0477878	SYT1, KCNB1, SLC6A4, KCNA4	78	177	16792	4.86513	1	0.568147	54.0724
GOTERM_BP_DIRECT	GO:0001946~lymphangiogenesis	2	0.0142025	0.0493143	PTPN14, PROX1	78	11	16792	39.1422	1	0.573948	55.2285
GOTERM_BP_DIRECT	GO:0090051~negative regulation of cell migration involved in sprouting angiogenesis	2	0.0142025	0.0493143	MEOX2, KLF4	78	11	16792	39.1422	1	0.573948	55.2285
GOTERM_BP_DIRECT	GO:0030335~positive regulation of cell migration	4	0.0284051	0.0525303	F3, IGF1, PDGFD, KIT	78	184	16792	4.68004	1	0.591765	57.5755
GOTERM_BP_DIRECT	GO:0006814~sodium ion transport	3	0.0213038	0.0532955	SCN3A, SLC4A8, ATP1A2	78	81	16792	7.97341	1	0.591441	58.1166
GOTERM_BP_DIRECT	GO:0043410~positive regulation of MAPK cascade	3	0.0213038	0.0532955	IGF1, PELI2, KIT	78	81	16792	7.97341	1	0.591441	58.1166
GOTERM_BP_DIRECT	GO:2000505~regulation of energy homeostasis	2	0.0142025	0.0536766	FOXO1, NR4A3	78	12	16792	35.8803	1	0.588451	58.3838
GOTERM_BP_DIRECT	GO:0071397~cellular response to cholesterol	2	0.0142025	0.0536766	INHBA, LRP8	78	12	16792	35.8803	1	0.588451	58.3838
GOTERM_BP_DIRECT	GO:0006813~potassium ion transport	3	0.0213038	0.0544695	KCNJ6, KCNA4, ATP1A2	78	82	16792	7.87617	1	0.588382	58.9345
GOTERM_BP_DIRECT	GO:0050731~positive regulation of peptidyl-tyrosine phosphorylation	3	0.0213038	0.0544695	IGF1, LRP8, HTR2A	78	82	16792	7.87617	1	0.588382	58.9345
GOTERM_BP_DIRECT	GO:0006919~activation of cysteine-type endopeptidase activity involved in apoptotic process	3	0.0213038	0.0556528	DLC1, F3, PPARG	78	83	16792	7.78128	1	0.590968	59.7435
GOTERM_BP_DIRECT	GO:0060070~canonical Wnt signaling pathway	3	0.0213038	0.0556528	SDC1, SFRP1, KLF4	78	83	16792	7.78128	1	0.590968	59.7435
GOTERM_BP_DIRECT	GO:0051897~positive regulation of protein kinase B signaling	3	0.0213038	0.0568451	SPRY2, F3, GATA3	78	84	16792	7.68864	1	0.593531	60.5436
GOTERM_BP_DIRECT	GO:0043066~negative regulation of apoptotic process	6	0.0426076	0.0577796	SPRY2, EGR3, SFRP1, FOXO1, IGF1, SIX4	78	455	16792	2.83888	1	0.594336	61.1603
GOTERM_BP_DIRECT	GO:0071391~cellular response to estrogen stimulus	2	0.0142025	0.058019	SFRP1, ESR1	78	13	16792	33.1203	1	0.590631	61.3168
GOTERM_BP_DIRECT	GO:0061029~eyelid development in camera-type eye	2	0.0142025	0.058019	INHBA, SOX11	78	13	16792	33.1203	1	0.590631	61.3168
GOTERM_BP_DIRECT	GO:0089711~L-glutamate transmembrane transport	2	0.0142025	0.058019	SLC25A22, SLC7A11	78	13	16792	33.1203	1	0.590631	61.3168
GOTERM_BP_DIRECT	GO:0043303~mast cell degranulation	2	0.0142025	0.058019	NR4A3, KIT	78	13	16792	33.1203	1	0.590631	61.3168
GOTERM_BP_DIRECT	GO:0009636~response to toxic substance	3	0.0213038	0.0580463	SDC1, SLC6A4, SLC7A11	78	85	16792	7.59819	1	0.585625	61.3346
GOTERM_BP_DIRECT	GO:0045821~positive regulation of glycolytic process	2	0.0142025	0.0623419	IGF1, HTR2A	78	14	16792	30.7546	1	0.607473	64.0433
GOTERM_BP_DIRECT	GO:0032355~response to estradiol	3	0.0213038	0.0654359	TXNIP, SLC6A4, ESR1	78	91	16792	7.09721	1	0.620803	65.883
GOTERM_BP_DIRECT	GO:0061003~positive regulation of dendritic spine morphogenesis	2	0.0142025	0.0666451	PAK3, LRP8	78	15	16792	28.7043	1	0.622769	66.5777
GOTERM_BP_DIRECT	GO:0032270~positive regulation of cellular protein metabolic process	2	0.0142025	0.0666451	INHBA, KLF4	78	15	16792	28.7043	1	0.622769	66.5777
GOTERM_BP_DIRECT	GO:0010613~positive regulation of cardiac muscle hypertrophy	2	0.0142025	0.0709288	IGF1, NR4A3	78	16	16792	26.9103	1	0.641582	68.9337
GOTERM_BP_DIRECT	GO:0045956~positive regulation of calcium ion-dependent exocytosis	2	0.0142025	0.0709288	SYT1, KCNB1	78	16	16792	26.9103	1	0.641582	68.9337
GOTERM_BP_DIRECT	GO:1900006~positive regulation of dendrite development	2	0.0142025	0.0709288	LRP8, VLDLR	78	16	16792	26.9103	1	0.641582	68.9337
GOTERM_BP_DIRECT	GO:0071380~cellular response to prostaglandin E stimulus	2	0.0142025	0.0751932	SFRP1, PPARG	78	17	16792	25.3273	1	0.659	71.1237
GOTERM_BP_DIRECT	GO:0042523~positive regulation of tyrosine phosphorylation of Stat5 protein	2	0.0142025	0.0751932	IGF1, KIT	78	17	16792	25.3273	1	0.659	71.1237
GOTERM_BP_DIRECT	GO:0010468~regulation of gene expression	3	0.0213038	0.0770693	TGFBR2, IGF1, PROX1	78	100	16792	6.45846	1	0.663611	72.0406
GOTERM_BP_DIRECT	GO:1903861~positive regulation of dendrite extension	2	0.0142025	0.0794382	SYT1, UNC13A	78	18	16792	23.9202	1	0.670435	73.1594
GOTERM_BP_DIRECT	GO:0060037~pharyngeal system development	2	0.0142025	0.0794382	GATA3, SIX4	78	18	16792	23.9202	1	0.670435	73.1594
GOTERM_BP_DIRECT	GO:0001709~cell fate determination	2	0.0142025	0.0794382	GATA3, PROX1	78	18	16792	23.9202	1	0.670435	73.1594
GOTERM_BP_DIRECT	GO:0010975~regulation of neuron projection development	2	0.0142025	0.083664	SFRP1, GATA3	78	19	16792	22.6613	1	0.685525	75.0517
GOTERM_BP_DIRECT	GO:0001659~temperature homeostasis	2	0.0142025	0.083664	FOXO1, HTR2A	78	19	16792	22.6613	1	0.685525	75.0517
GOTERM_BP_DIRECT	GO:0000187~activation of MAPK activity	3	0.0213038	0.0865335	PAK3, IGF1, KIT	78	107	16792	6.03595	1	0.693764	76.2646
GOTERM_BP_DIRECT	GO:0007275~multicellular organism development	6	0.0426076	0.0908559	HOXA3, MEOX2, SFRP1, EBF1, OTX2, PDGFD	78	521	16792	2.47926	1	0.707719	77.9878
GOTERM_BP_DIRECT	GO:0007369~gastrulation	2	0.0142025	0.0920582	TGFBR2, NR4A3	78	21	16792	20.5031	1	0.708268	78.4459
GOTERM_BP_DIRECT	GO:0097150~neuronal stem cell population maintenance	2	0.0142025	0.0920582	FOXO1, PROX1	78	21	16792	20.5031	1	0.708268	78.4459
GOTERM_BP_DIRECT	GO:0071542~dopaminergic neuron differentiation	2	0.0142025	0.0962268	SFRP1, OTX2	78	22	16792	19.5711	1	0.720589	79.9657
GOTERM_CC_DIRECT	GO:0005901~caveola	5	0.0355063	0.000199538	DLC1, TGFBR2, LRP8, ATP1A2, HTR2A	82	65	18224	17.0957	0.0269691	0.0269691	0.234289
GOTERM_CC_DIRECT	GO:0005886~plasma membrane	31	0.220139	0.00229975	SYT1, PLXNA4, RAB3C, SCN3A, SLC6A4, CABP1, KCNA4, AKAP12, KIT, SPRY2, PAK3, SLC4A8, CA12, KCNB1, SLC12A5, TGFBR2, MDGA2, ESR1, IGF1, ATP1A2, SLC7A11, SDC1, KCNJ6, SFRP1, F3, ANTXR2, LRP8, SH3D19, FAM126A, HTR2A, VLDLR	82	4121	18224	1.67182	0.270524	0.145906	2.66999
GOTERM_CC_DIRECT	GO:0030424~axon	5	0.0355063	0.0171913	KCNB1, KCNA4, LRP8, UNC13A, HTR2A	82	222	18224	5.00549	0.907049	0.547014	18.4396
GOTERM_CC_DIRECT	GO:0043235~receptor complex	4	0.0284051	0.0190111	TGFBR2, NR3C2, LRP8, VLDLR	82	127	18224	6.99981	0.927893	0.481803	20.1972
GOTERM_CC_DIRECT	GO:0043005~neuron projection	5	0.0355063	0.0212878	SYT1, SLC6A4, SLC4A8, UNC13A, FAM126A	82	237	18224	4.68869	0.947551	0.445442	22.3472
GOTERM_CC_DIRECT	GO:0005634~nucleus	33	0.234342	0.0375004	DLC1, PPARG, NR3C2, SOBP, ZNF367, FOXO1, ZEB2, CBX8, SPRY2, HOXA3, MYOCD, GATA3, TXNIP, EGR3, SOX11, OTX2, PTPN14, ESR1, DEPDC1, NR4A3, SIX4, RACGAP1, PROX1, ESCO2, FOXN3, MYT1L, PPM1E, CSRNP3, MEOX2, ZIC5, EBF1, HIF3A, CELF2	82	5415	18224	1.35439	0.99468	0.582189	36.1902
GOTERM_CC_DIRECT	GO:0000790~nuclear chromatin	4	0.0284051	0.0547442	GATA3, ESR1, CBX8, KLF4	82	193	18224	4.60609	0.999553	0.667749	48.4055
GOTERM_CC_DIRECT	GO:0008076~voltage-gated potassium channel complex	3	0.0213038	0.0584373	KCNJ6, KCNB1, KCNA4	82	88	18224	7.5765	0.999739	0.643411	50.7258
GOTERM_CC_DIRECT	GO:0009897~external side of plasma membrane	4	0.0284051	0.0692751	SDC1, TGFBR2, ANTXR2, KIT	82	213	18224	4.17359	0.999946	0.664733	56.9948
GOTERM_CC_DIRECT	GO:0032809~neuronal cell body membrane	2	0.0142025	0.0770869	KCNB1, SLC4A8	82	18	18224	24.6938	0.999983	0.666802	61.0512
GOTERM_CC_DIRECT	GO:0005856~cytoskeleton	5	0.0355063	0.0832659	SPRY2, CABP1, PTPN14, AKAP12, SLC7A11	82	371	18224	2.9952	0.999993	0.661344	64.0083
GOTERM_CC_DIRECT	GO:0042629~mast cell granule	2	0.0142025	0.0893512	NR4A3, KIT	82	21	18224	21.1661	0.999997	0.656503	66.7184
GOTERM_CC_DIRECT	GO:0005887~integral component of plasma membrane	11	0.0781139	0.0961188	SDC1, PLXNA4, SLC16A6, SLC6A4, TGFBR2, SLC12A5, KCNA4, MMD, SLC4A8, SLC7A11, HTR2A	82	1415	18224	1.72769	0.999999	0.655268	69.5122
GOTERM_MF_DIRECT	GO:0001077~transcriptional activator activity, RNA polymerase II core promoter proximal region sequence-specific binding	10	0.0710126	1.10562e-06	MEOX2, MYOCD, SOX11, GATA3, EBF1, OTX2, ESR1, NR4A3, SIX4, KLF4	77	236	16881	9.28957	0.000259788	0.000259788	0.00142231
GOTERM_MF_DIRECT	GO:0001046~core promoter sequence-specific DNA binding	6	0.0426076	1.36322e-06	MYOCD, GATA3, PPARG, ESR1, NR4A3, PROX1	77	43	16881	30.5908	0.000320306	0.000160166	0.00175369
GOTERM_MF_DIRECT	GO:0003700~transcription factor activity, sequence-specific DNA binding	15	0.106519	8.58389e-05	EGR3, SOX11, PPARG, OTX2, NR3C2, ESR1, ZNF367, PROX1, FOXN3, MYT1L, HOXA3, CSRNP3, MEOX2, GATA3, KLF4	77	961	16881	3.42196	0.0199709	0.00670178	0.110371
GOTERM_MF_DIRECT	GO:0043565~sequence-specific DNA binding	11	0.0781139	0.000105211	HOXA3, CSRNP3, MEOX2, OTX2, PPARG, NR3C2, ESR1, FOXO1, NR4A3, SIX4, FOXN3	77	518	16881	4.65554	0.0244228	0.00616242	0.135264
GOTERM_MF_DIRECT	GO:0003707~steroid hormone receptor activity	4	0.0284051	0.00204801	PPARG, NR3C2, ESR1, NR4A3	77	56	16881	15.6596	0.382315	0.0918586	2.60288
GOTERM_MF_DIRECT	GO:0017075~syntaxin-1 binding	3	0.0213038	0.00292083	SYT1, SLC6A4, UNC13A	77	18	16881	36.539	0.497118	0.108247	3.69306
GOTERM_MF_DIRECT	GO:0008144~drug binding	4	0.0284051	0.00487061	SFRP1, PPARG, ATP1A2, HTR2A	77	76	16881	11.5386	0.682536	0.151184	6.08788
GOTERM_MF_DIRECT	GO:0038025~reelin receptor activity	2	0.0142025	0.0089842	LRP8, VLDLR	77	2	16881	219.234	0.880068	0.232874	10.9613
GOTERM_MF_DIRECT	GO:0046872~metal ion binding	18	0.127823	0.00947178	EGR3, TGFBR2, SLC6A4, SOBP, ZNF367, ZEB2, ATP1A2, KIT, RACGAP1, ESCO2, COL5A1, PPM1E, PAK3, ZIC5, EBF1, ANTXR2, KLF4, UNC13A	77	2069	16881	1.9073	0.893166	0.220028	11.5232
GOTERM_MF_DIRECT	GO:0005515~protein binding	51	0.362164	0.0105208	DLC1, SYT1, SLC6A4, PPARG, FOXO1, ZEB2, CBX8, SPRY2, MYOCD, PAK3, GATA3, ROBO2, PELI2, OTX2, ESR1, DEPDC1, PROX1, SLC7A11, FOXN3, INHBA, SDC1, PPM1E, F3, CFL2, RAB3C, MAL2, CABP1, NR3C2, AKAP12, KCNA4, CEP55, KIT, HOXA3, TXNIP, KCNB1, TGFBR2, PTPN14, IGF1, NR4A3, ATP1A2, RACGAP1, KCNJ6, SFRP1, MEOX2, EBF1, LRP8, ANTXR2, SH3D19, KLF4, FAM126A, VLDLR	77	8785	16881	1.27273	0.916715	0.220068	12.7211
GOTERM_MF_DIRECT	GO:0004879~RNA polymerase II transcription factor activity, ligand-activated sequence-specific DNA binding	3	0.0213038	0.0114145	PPARG, ESR1, NR4A3	77	36	16881	18.2695	0.932648	0.217497	13.7297
GOTERM_MF_DIRECT	GO:0030229~very-low-density lipoprotein particle receptor activity	2	0.0142025	0.0178887	LRP8, VLDLR	77	4	16881	109.617	0.98562	0.297769	20.7222
GOTERM_MF_DIRECT	GO:0048306~calcium-dependent protein binding	3	0.0213038	0.0281081	SYT1, CABP1, VLDLR	77	58	16881	11.3397	0.998769	0.40273	30.7034
GOTERM_MF_DIRECT	GO:0008083~growth factor activity	4	0.0284051	0.0366555	BMP3, INHBA, IGF1, PDGFD	77	162	16881	5.41318	0.999846	0.465727	38.1471
GOTERM_MF_DIRECT	GO:0001223~transcription coactivator binding	2	0.0142025	0.0441313	FOXO1, NR4A3	77	10	16881	43.8468	0.999975	0.506933	44.0456
GOTERM_MF_DIRECT	GO:0008013~beta-catenin binding	3	0.0213038	0.0527233	ESR1, FOXO1, KLF4	77	82	16881	8.02075	0.999997	0.54866	50.1818
GOTERM_MF_DIRECT	GO:0005041~low-density lipoprotein receptor activity	2	0.0142025	0.0569919	LRP8, VLDLR	77	13	16881	33.7283	0.999999	0.555662	52.9938
GOTERM_MF_DIRECT	GO:0034185~apolipoprotein binding	2	0.0142025	0.0612407	LRP8, VLDLR	77	14	16881	31.3191	1	0.561792	55.6467
GOTERM_MF_DIRECT	GO:0030955~potassium ion binding	2	0.0142025	0.0612407	KCNA4, ATP1A2	77	14	16881	31.3191	1	0.561792	55.6467
GOTERM_MF_DIRECT	GO:0001228~transcriptional activator activity, RNA polymerase II transcription regulatory region sequence-specific binding	3	0.0213038	0.0683133	CSRNP3, MYOCD, GATA3	77	95	16881	6.92317	1	0.58321	59.7584
GOTERM_MF_DIRECT	GO:0003677~DNA binding	13	0.0923164	0.0702488	MYT1L, EGR3, GATA3, EBF1, ZIC5, OTX2, PPARG, HIF3A, ESR1, ZNF367, ZEB2, NR4A3, PROX1	77	1674	16881	1.70253	1	0.575078	60.8207
GOTERM_MF_DIRECT	GO:0044212~transcription regulatory region DNA binding	4	0.0284051	0.0713204	GATA3, PPARG, PROX1, KLF4	77	213	16881	4.11707	1	0.563078	61.3977
GOTERM_MF_DIRECT	GO:0000978~RNA polymerase II core promoter proximal region sequence-specific DNA binding	5	0.0355063	0.0760749	MEOX2, OTX2, ESR1, NR4A3, SIX4	77	355	16881	3.0878	1	0.570525	63.8643
GOTERM_MF_DIRECT	GO:0071837~HMG box domain binding	2	0.0142025	0.0780477	HOXA3, GATA3	77	18	16881	24.3593	1	0.564075	64.8444
GOTERM_MF_DIRECT	GO:0001158~enhancer sequence-specific DNA binding	2	0.0142025	0.0863396	SOX11, GATA3	77	20	16881	21.9234	1	0.586935	68.7018
GOTERM_MF_DIRECT	GO:0001078~transcriptional repressor activity, RNA polymerase II core promoter proximal region sequence-specific binding	3	0.0213038	0.0892726	GATA3, FOXO1, PROX1	77	111	16881	5.92524	1	0.584806	69.97
GOTERM_MF_DIRECT	GO:0000987~core promoter proximal region sequence-specific DNA binding	2	0.0142025	0.0945578	GATA3, KLF4	77	22	16881	19.9303	1	0.592538	72.1364
KEGG_PATHWAY	hsa04510:Focal adhesion	4	0.0284051	0.0500498	PAK3, IGF1, PDGFD, COL5A1	29	206	6879	4.60596	0.991985	0.700794	43.0648
KEGG_PATHWAY	hsa04014:Ras signaling pathway	4	0.0284051	0.0627209	PAK3, IGF1, PDGFD, KIT	29	226	6879	4.19835	0.997732	0.704106	50.8634
KEGG_PATHWAY	hsa05200:Pathways in cancer	5	0.0355063	0.0726173	TGFBR2, PPARG, FOXO1, IGF1, KIT	29	393	6879	3.0179	0.999164	0.693057	56.2644
KEGG_PATHWAY	hsa04726:Serotonergic synapse	3	0.0213038	0.0743293	KCNJ6, SLC6A4, HTR2A	29	111	6879	6.411	0.999297	0.645547	57.142
KEGG_PATHWAY	hsa04919:Thyroid hormone signaling pathway	3	0.0213038	0.0790263	ESR1, FOXO1, ATP1A2	29	115	6879	6.18801	0.999564	0.619894	59.4682
KEGG_PATHWAY	hsa04152:AMPK signaling pathway	3	0.0213038	0.0886942	PPARG, FOXO1, IGF1	29	123	6879	5.78553	0.999838	0.620934	63.8989
KEGG_PATHWAY	hsa04360:Axon guidance	3	0.0213038	0.0936573	PAK3, CFL2, ROBO2	29	127	6879	5.60331	0.999903	0.603221	65.9981
